# Supplementary material for: A TiO2nanotube network electron transport layer for high efficiency perovskite solar cells
Source: Royal Society of Chemistry journal article supplement (doi:10.1039/c6cp07733a), 2017-01-01
Supplement: c6cp07733a1.pdf [file c6cp07733a1.pdf]

# Supplementary Information

## A TiO<sub>2</sub> Nanotube Network Electron Transport Layer for High Efficiency Perovskite Solar Cells

Xianfeng Gao,<sup>a,b</sup> Jianyang Li,<sup>b</sup> Sam Gollon,<sup>b</sup> Ming Qiu,<sup>b</sup> Dongsheng Guan,<sup>b</sup> Xiaoru Guo,

<sup>b</sup>, Junhong Chen,<sup>b</sup> Chris Yuan,<sup>a,b</sup> \*

<sup>a</sup>Department of Mechanical and Aerospace Engineering, Case Western Reserve University, Ohio, 44106, USA

<sup>b</sup>Department of Mechanical Engineering, University of Wisconsin Milwaukee, Wisconsin, 53211, USA

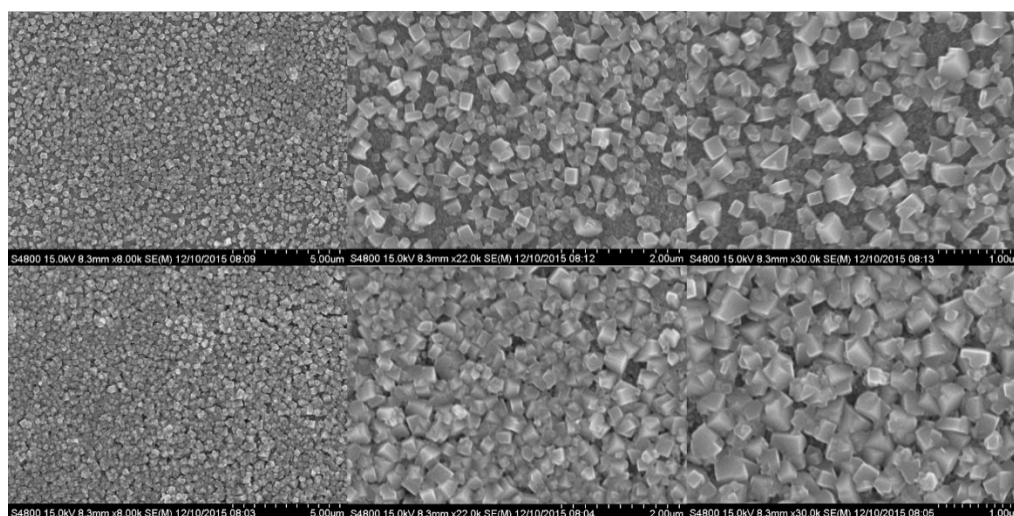

**Figure S1.** Comparison of perovskite deposition between nanoparticle (top) and nanotube based electrode (bottom).

**Table S1.** Hysteresis data of the perovskite solar cells based on TiO<sub>2</sub> nanotube network electrode and nanoparticle mesoporous electrode. Reverse scan direction: from 1.1 V to 0 V, forward scan direction: from 0 to 1.1 V.

|                      | $V_{oc}$ (V) | $J_{sc}$ (mA/cm <sup>2</sup> ) | $FF$ | $\eta$ (%) |
|----------------------|--------------|--------------------------------|------|------------|
| Nanoparticle reverse | 0.84         | 21.7                           | 0.60 | 10.9       |
| Nanoparticle forward | 0.82         | 19.4                           | 0.5  | 7.9        |
| Nanotube reverse     | 0.88         | 24.8                           | 0.63 | 13.8       |
| Nanotube forward     | 0.85         | 23.2                           | 0.59 | 11.6       |

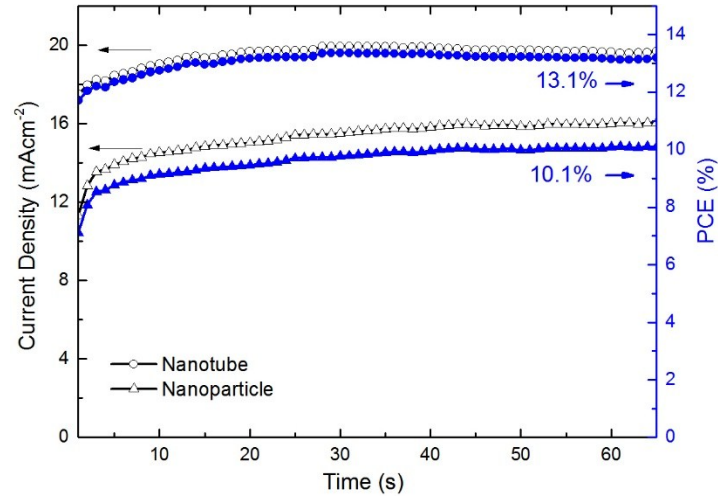

Figure S2 The photocurrent density as a function of time for the cells held at a forward bias of the maximum output power point (0.67 and 0.63 V for the devices based on nanotube and nanoparticle, respectively).
